# Supplementary material for: Antisense ribosomal siRNAs inhibit RNA polymerase I-directed transcription in C. elegans
Source: PubMed Central journal article supplement (PMC8450093; doi:10.1093/nar/gkab662), 2021-08-07
Supplement: gkab662_supplemental_file.pdf [file gkab662_supplemental_file.pdf]

1 **Supplementary figure legends:**

2 **Fig. S1.** *susi-5* was identified as *dis-3*. (A) Schematic of SUSI-5(ceDIS-3) (top) and  
3 sequence alignments of DIS-3 in different organisms: hs, *homo sapiens*; mm, *Mus*  
4 *musculus*; sp, *Schizosaccharomyces pombe*; dm, *Drosophila melanogaster*; and ce, *C.*  
5 *elegans*. (B) Images of seam cells of *eri-1(mg366);dis-3(ust56);gfp::nrde-*  
6 *3;mCherry::dis-3* animals at L4 stage. mCherry::DIS-3 rescued the cytoplasmic  
7 localization of GFP::NRDE-3 in *eri-1(-)* animals. Scale bars, 10  $\mu$ m. (C) Brood size of  
8 the *dis-3* mutant grown at 20°C and 25°C, respectively. mean  $\pm$  s.d.; n > 10 animals.

9

10 **Fig. S2.** risiRNAs were accumulated in *dis-3(ust56)* mutants. (A) Results from the deep  
11 sequencing of total small RNAs from indicated animals. Green dashed lines indicate  
12 risiRNAs. (B) Distribution from the deep sequencing of NRDE-3-associated small  
13 RNAs in indicated animals. Sense fragments of lincRNA, protein-coding transcripts,  
14 transposon transcripts, ncRNA and ribosomal RNA are not counted. (C) Results from  
15 the deep sequencing of total small RNAs from the indicated animals. Green dashed  
16 lines indicate risiRNAs.

17

18 **Fig. S3.** Alleles of the exosome subunits used in this study. (A) Brood sizes of indicated  
19 animals grown at 20°C. Data are presented as mean  $\pm$  s.d.; n > 10 animals. Progeny  
20 reached L4 or young adult stages are counted to evaluate the fertility. (B-J) The *ust*  
21 alleles were generated via a dual sgRNA-directed CRISPR/Cas9 gene knockout  
22 technology in *C. elegans*. The *tm* alleles and *ok* alleles were acquired from National  
23 Bioresource Project and the CGC, respectively. *exos-5(ust61)*, *exos-7(ust62)*, and *exos-*  
24 *10(ok2269)* alleles are in-frame mutations and the translated products are predicted to  
25 lose 120, 89 and 208 amino acids respectively. All other alleles are frame-shift  
26 mutations, and likely nulls. Red bars indicate deleted regions in gene loci. Green arrows  
27 indicate premature stop codons.

28

29 **Fig. S4.** RPOA-2 localized to nucleoli in embryos. (A) Brood size of wild type animals  
30 upon RNAi targeting of *rpoa-2*. Data are presented as mean  $\pm$  s.d.; n=16 animals. (B)

31 Images of young gravid adult animals expressing GFP::RPOA-2. Scale bars, 25  $\mu$ m.  
32 (C) Images of *C. elegans* embryos expressing GFP::RPOA-2 (green) and mCherry::FIB-  
33 1 (red). Scale bars, 10  $\mu$ m. (D) Images of the embryos expressing GFP::RPOA-2. Scale  
34 bars, 25  $\mu$ m. White arrows indicate nucleoli. Scale bars, 10  $\mu$ m.

35

36 **Fig. S5.** Images of the animals expressing indicated transgenes in the presence of  
37 actinomycin D. Shown are embryos (A), soma of L4 stage animals (B), and germline  
38 (C). White arrows indicate nucleoli. Scale bars, 10  $\mu$ m.

39

40 **Fig. S6.** *dis-3* mutation did not change the expression of RPOA-2. (A) Images of seam  
41 cells of L4 stage animals expressing GFP::NRDE-3 in the presence of actinomycin D  
42 in the *eri-1(mg366)* background. Scale bars, 5  $\mu$ m. (B) Images show somatic cells of  
43 L4 stage animals expressing GFP::EXOS-10 in the presence of actinomycin D. The  
44 percentage of animals with nucleolar localized GFP::EXOS-10 is indicated (% NCL).  
45 The number of scored animals is indicated in parentheses. Scale bars, 10  $\mu$ m. (C)  
46 Western Blotting of GFP::RPOA-2 in indicated actinomycin D-treated animals. (D)  
47 Western Blotting of GFP::RPOA-2 in indicated animals.

48

49 **Fig. S7.** (A) Feeding RNAi targeting 18S rRNAs did not significantly change the brood  
50 size of animals. Animals were grown at 20°C. Data are presented as mean  $\pm$  s.d.; n > 10  
51 animals; ns, nonsignificance. (B) Results of the ChIP assay of RPOA-2 occupancy at  
52 rDNA loci by non-specific IgG or anti-GFP antibody. The enrichment of each sample  
53 was normalized to 1% input. Statistics were performed by comparing the data from the  
54 IgG or anti-GFP antibody groups. Mean  $\pm$  s.d.; n = 4, \*\*\*P<0.001. (C) Results of the  
55 ChIP assay of RPOA-2 at rDNA loci after feeding dsRNA targeting a protein coding  
56 gene *oma-1*. (D) Results of the ChIP assay of RPOA-2 at rDNA loci after feeding  
57 dsRNA targeting a 26S rRNA segment. The enrichment of each sample was first  
58 normalized to 1% input. And then fold changes were calculated by dividing the  
59 enrichment of indicated mutants by the number of control animals.

60

61 **Fig. S8.** Images of the animals expressing indicated transgenes. (A) L3 animals and (B)  
62 germline of young gravid adults. Scale bars, 25  $\mu\text{m}$ . (C) Images of 1-to-8 cell embryos  
63 from the animals expressing indicated transgenes. Scale bars, 10  $\mu\text{m}$ .

64

65 **Fig. S9.** Subcellular localization of the exosome subunits of L4 stage animals. (A)  
66 Images of somatic cells of the animals expressing indicated transgenes. The  
67 fluorescence intensity indicated by dashed lines was measured by ImageJ, and the  
68 values are shown on the right. Scale bars, 5  $\mu\text{m}$ . (B) Images of somatic cells of the  
69 animals expressing indicated transgenes. Scale bars, 5  $\mu\text{m}$ . (C) (left) Images of somatic  
70 cells of the indicated animals. Scale bars, 10  $\mu\text{m}$ . (right) Quantification of the nucleolar  
71 localization of GFP::EXOS-10. mean  $\pm$  s.d.;  $n > 70$  animals; ns, not significant. (D)  
72 (top) Images of somatic cells of the indicated animals. Scale bars, 10  $\mu\text{m}$ . (bottom)  
73 Quantification of the nucleolar localization of GFP::EXOS-10. mean  $\pm$  s.d.;  $n > 70$   
74 animals; ns, not significant.

75

76 **Fig. S10.** Schematics of the alleles that were generated via dual sgRNA-directed  
77 CRISPR/Cas9 gene knockout technology. Each of the alleles contains a frameshift  
78 mutation and is likely a null allele.

79

80 **Fig. S11.** The localization of nucleolar proteins. The expression and localization of  
81 mCherry::RBD-1 (A), mCherry::FIB-1 (B) and GFP::RRP-8 (C) upon RNAi indicated  
82 genes. Bleached embryos were placed on RNAi plates and grew up to L4 stage for  
83 photographing. Scale bars, 10  $\mu\text{m}$ .

84

85

86

87

88 **Table S1.** Candidate-base RNAi screening for factors affecting the subcellular  
89 localization of GFP::EXOS-10. The percentage of animals with nucleolar-localized  
90 GFP::EXOS-10 is indicated (% NCL).

91

92 **Table S2.** List of strains used in this study.

93

94 **Table S3.** Sequences of sgRNAs for CRISPR/Cas9-mediated gene editing.

95

96 **Table S4.** Sequences of quantitative real-time PCR primers for ChIP experiments.

97

98 **Table S5.** Sequences of quantitative real-time PCR primers for detecting the pre-rRNA  
99 and rRNA levels.

A

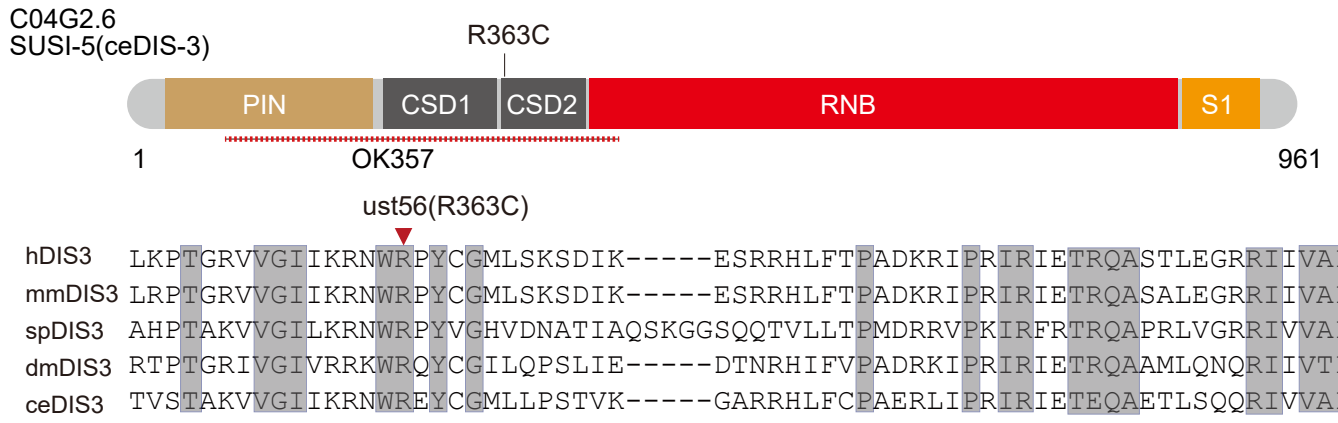

B

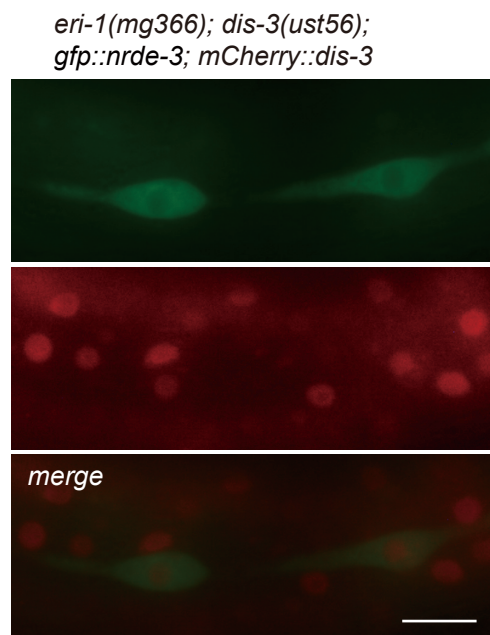

C

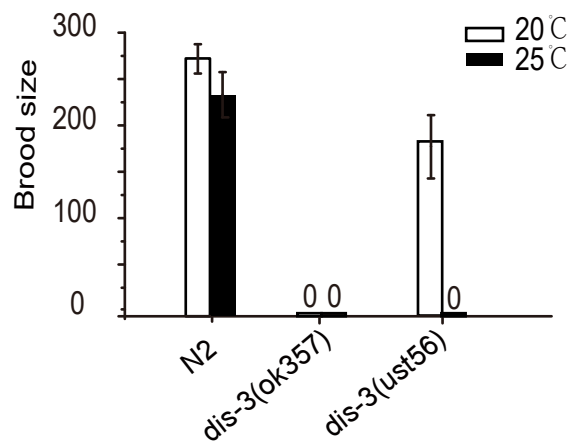

A

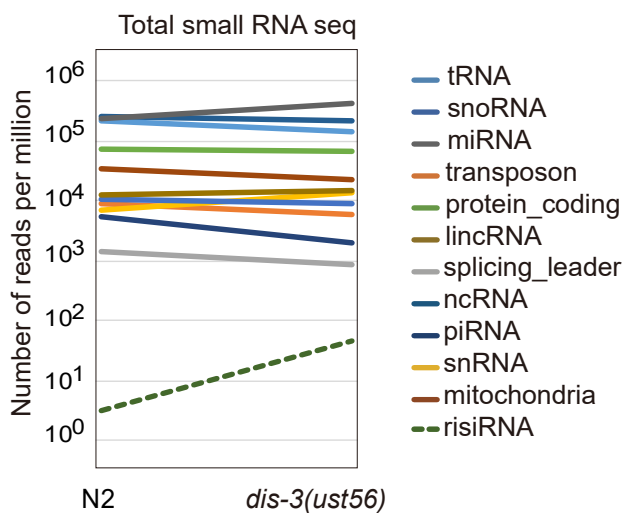

B

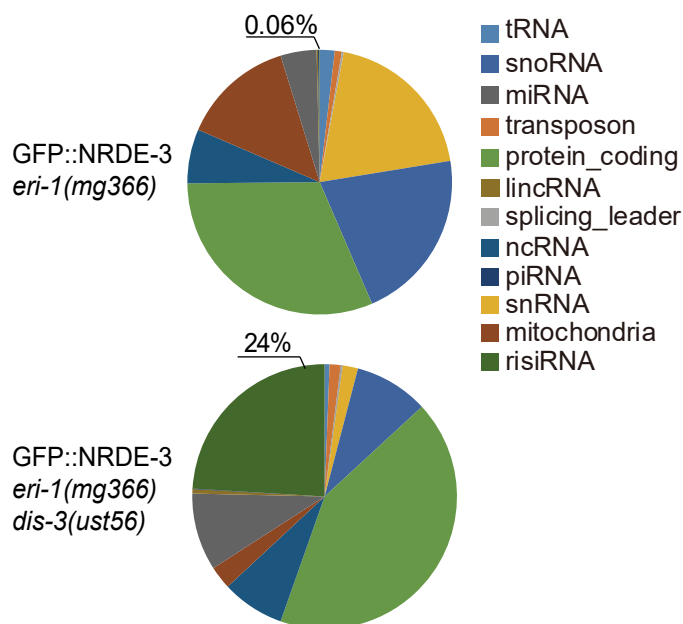

C

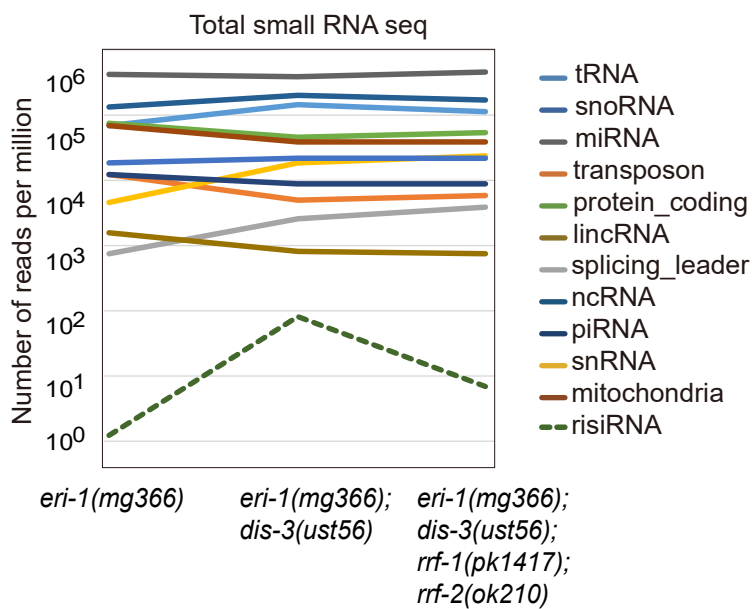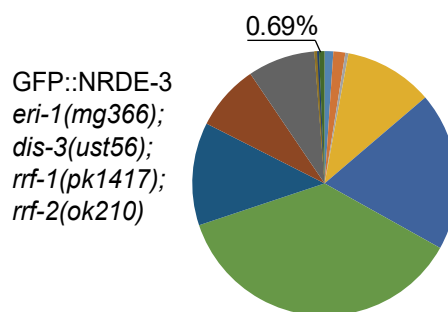

A

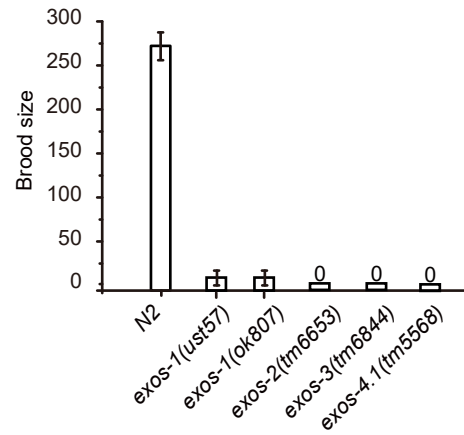

B

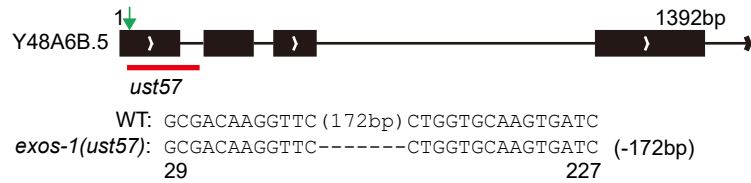

C

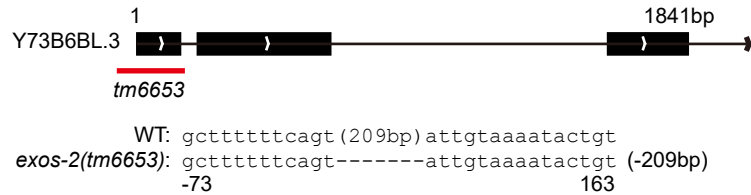

D

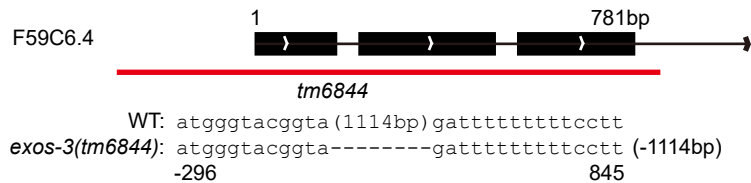

E

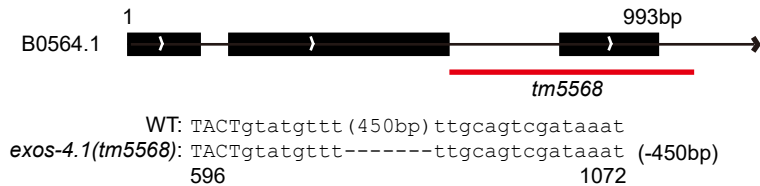

F

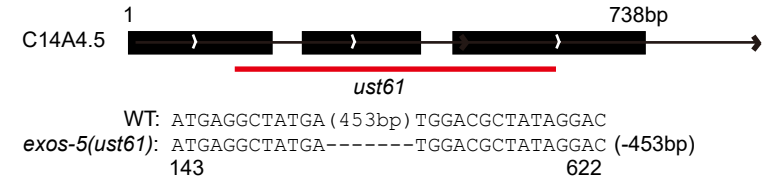

G

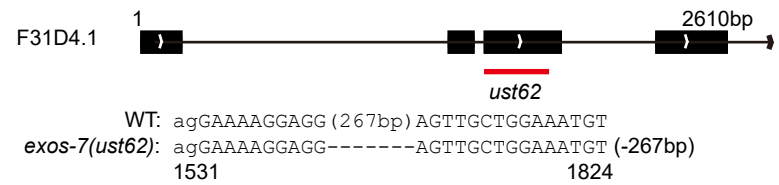

H

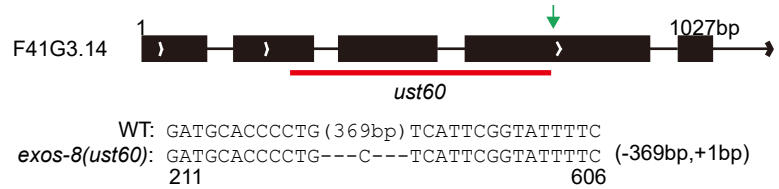

I

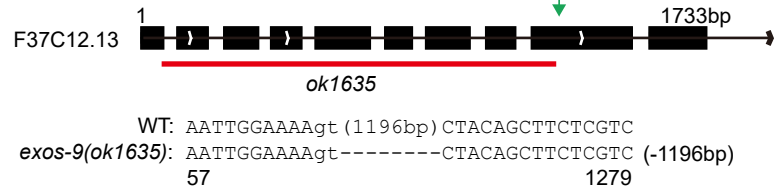

J

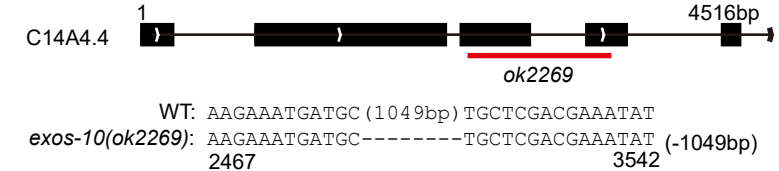

A

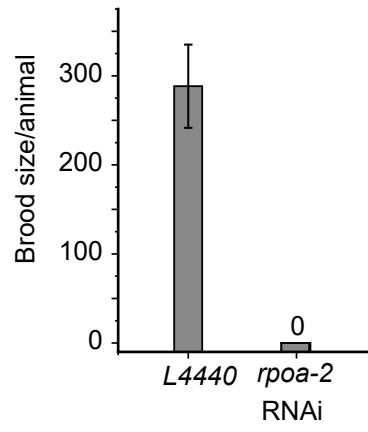

B

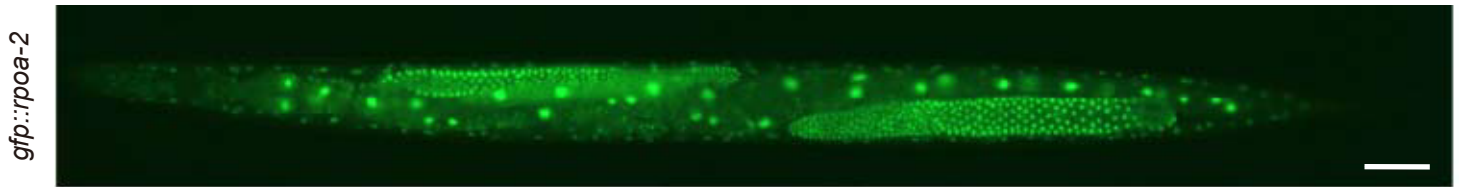

C

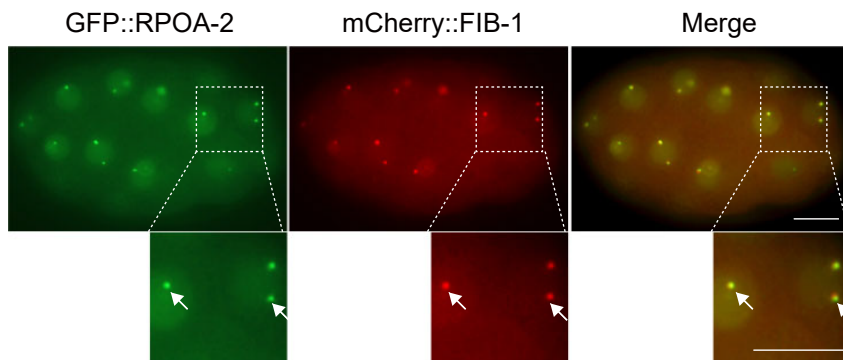

D

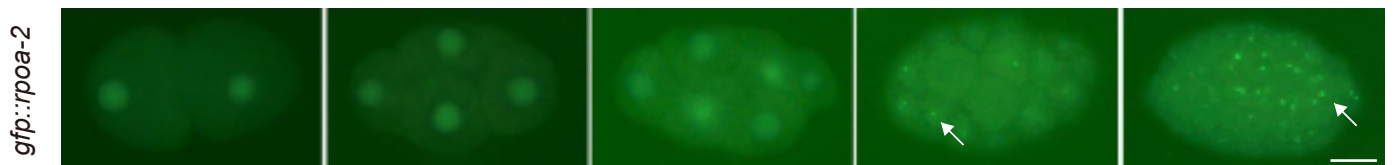



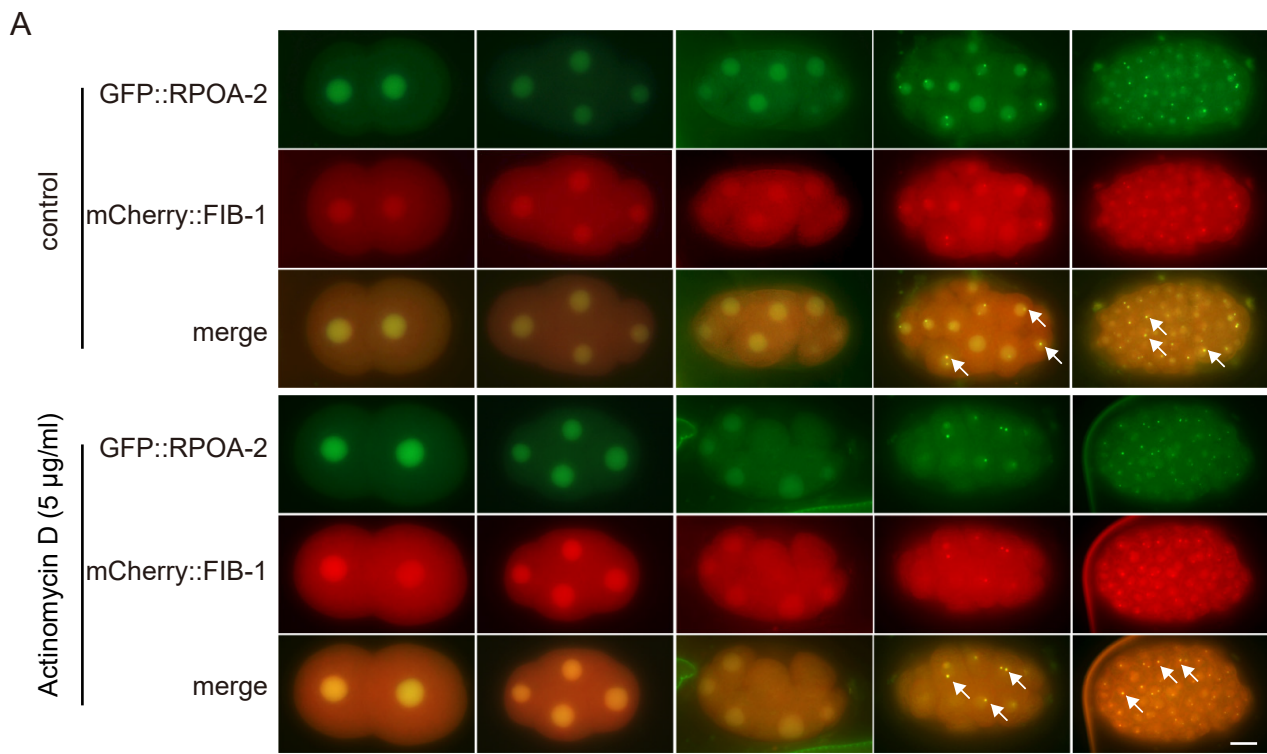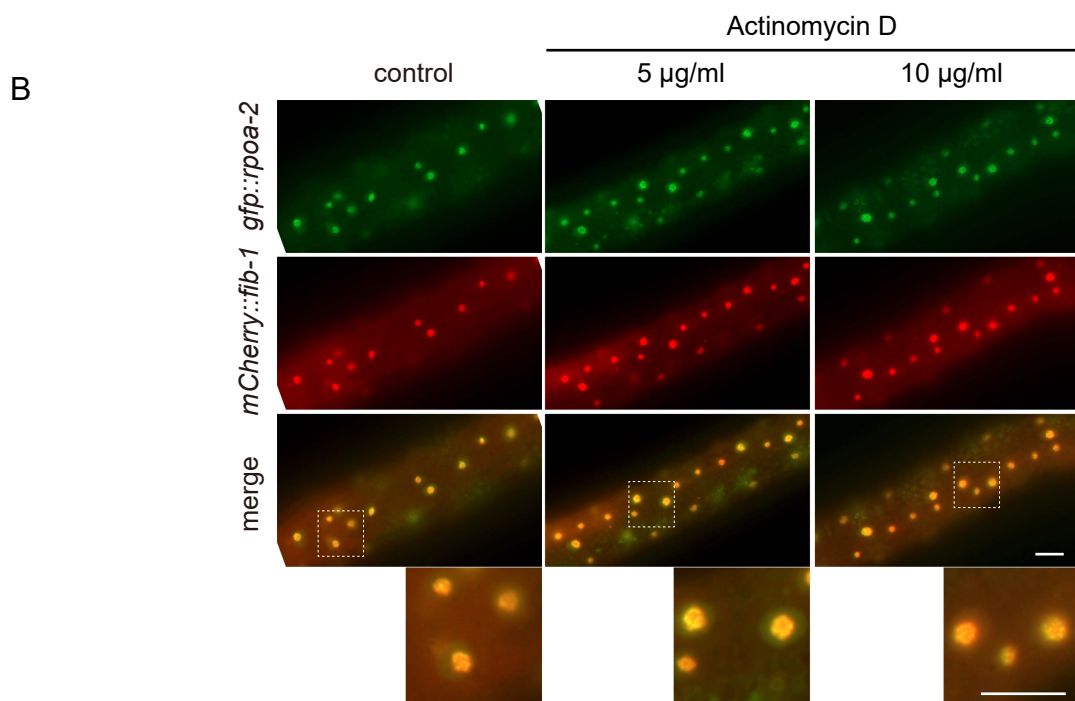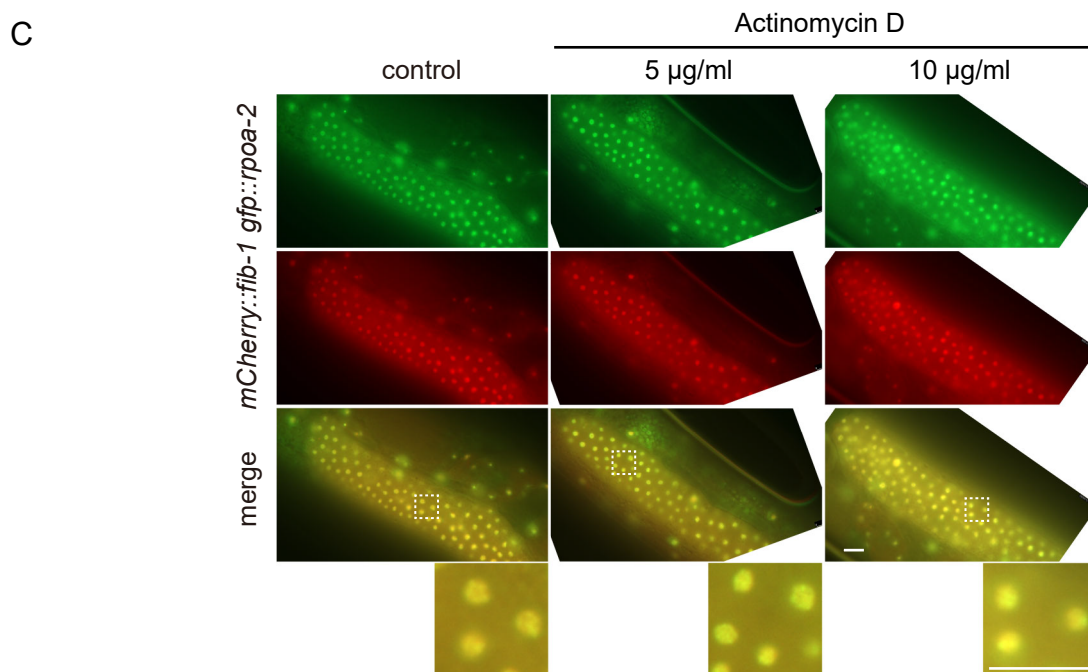

Figure S5

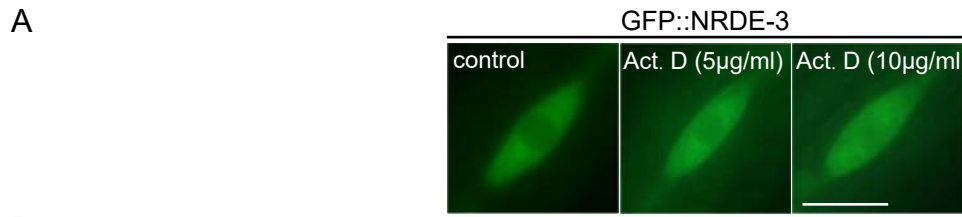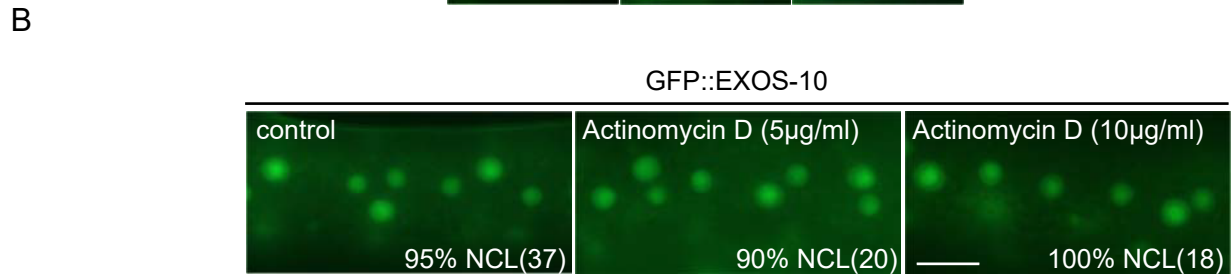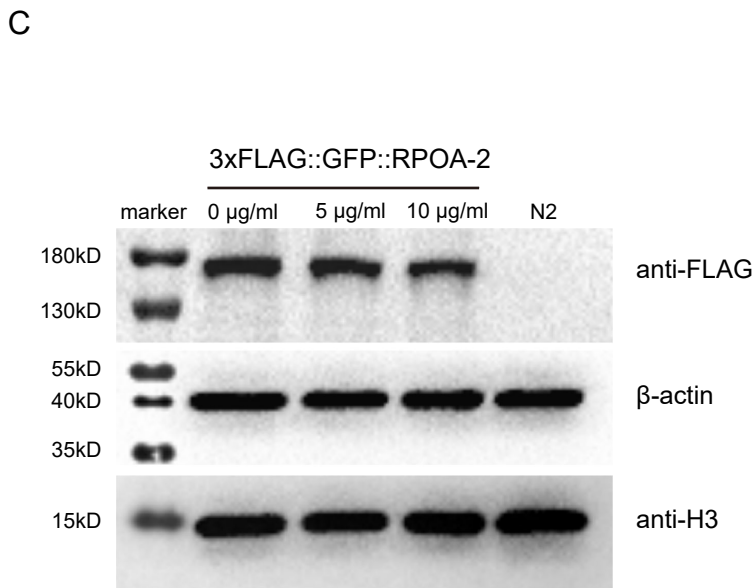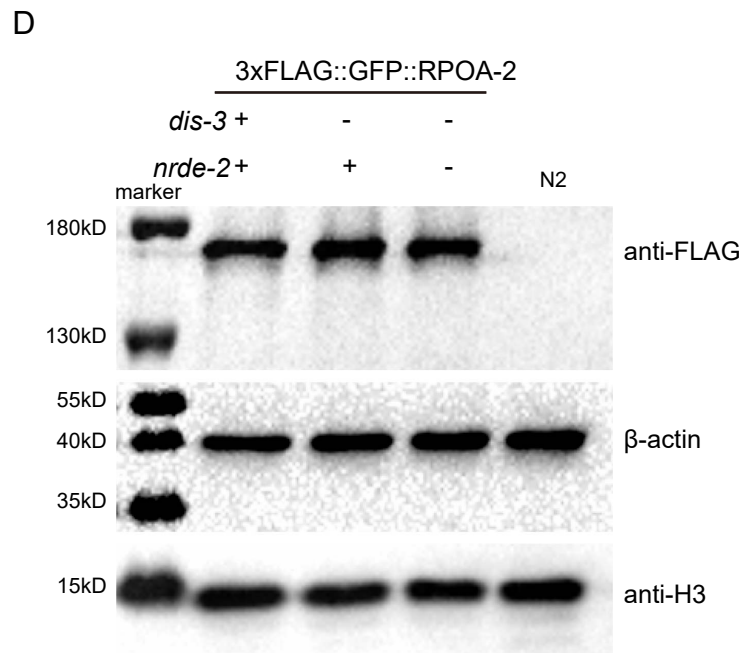

Figure S6

A

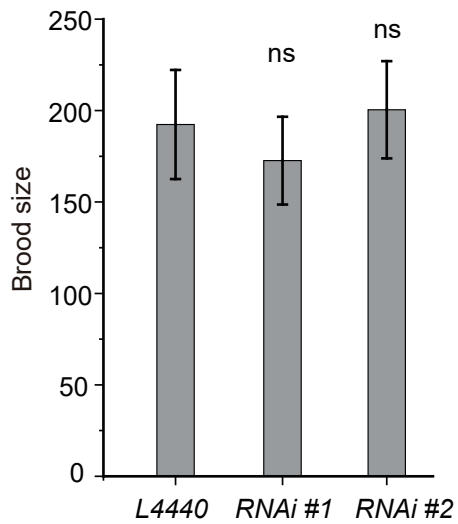

B

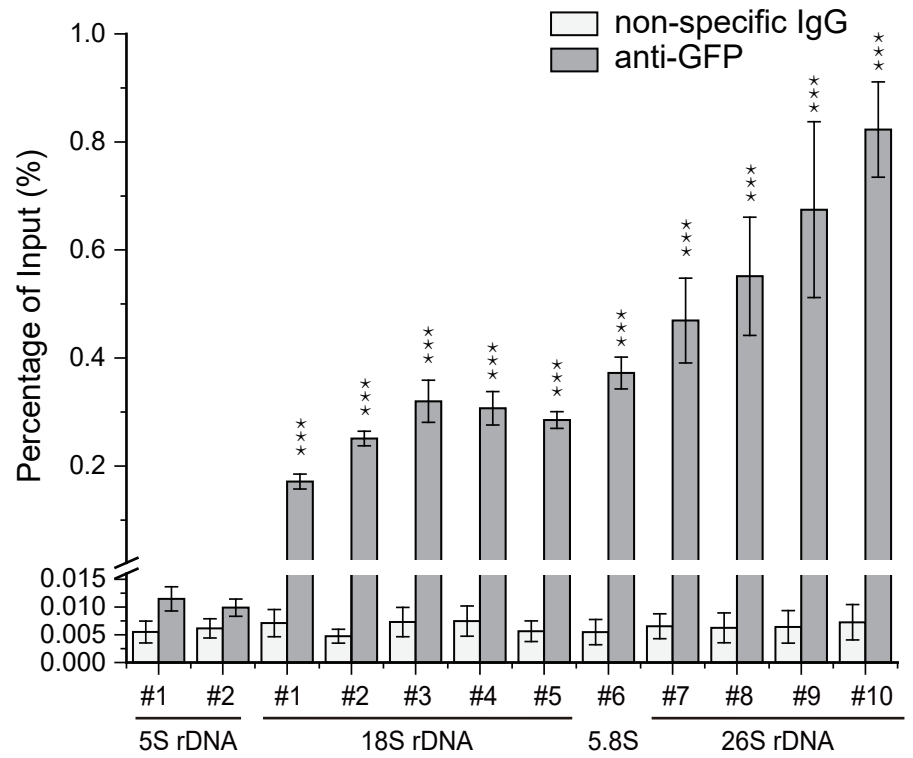

C

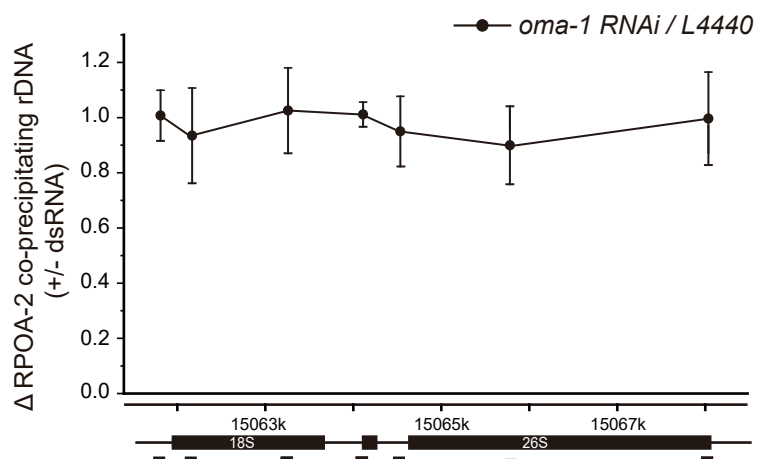

D

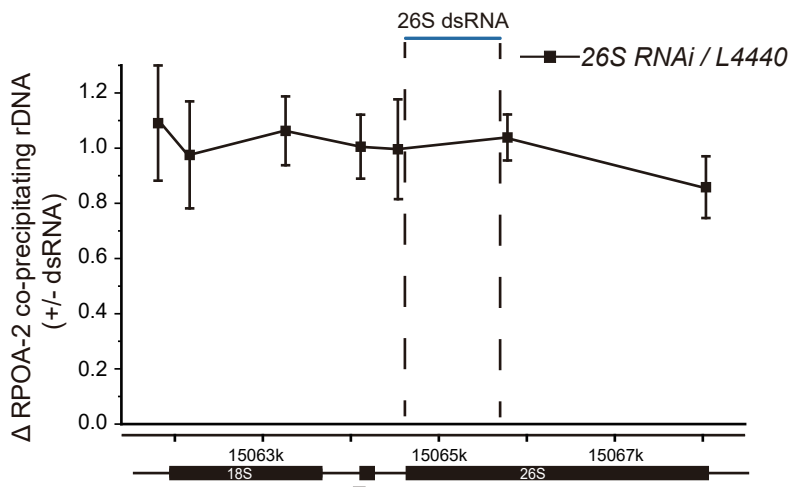

A

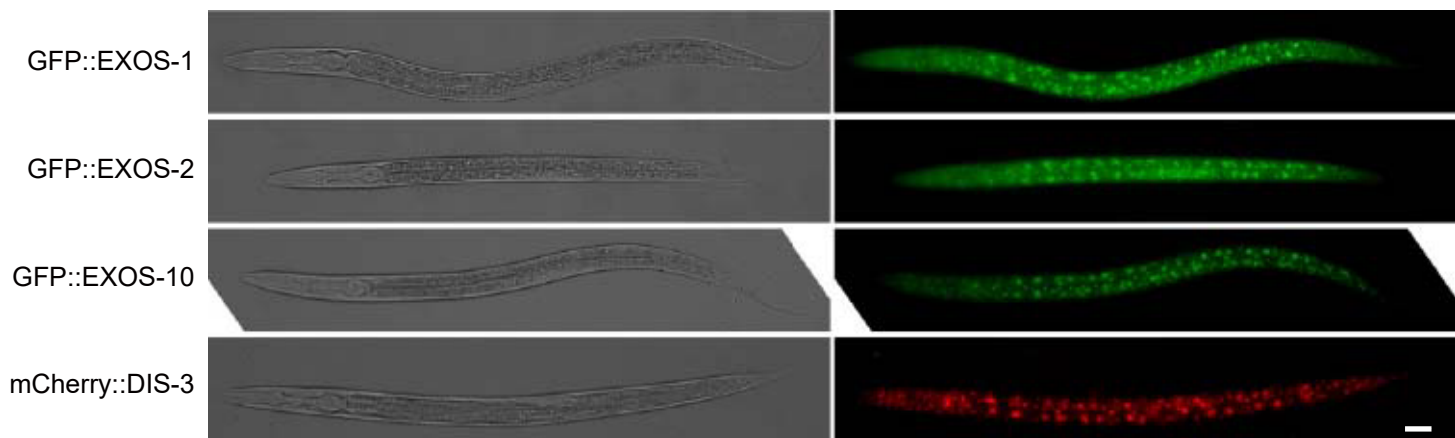

B

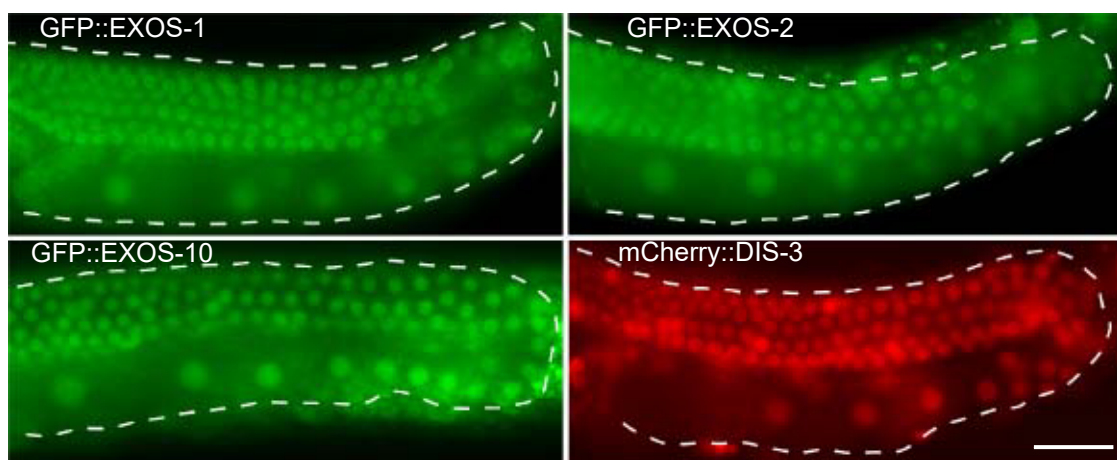

C

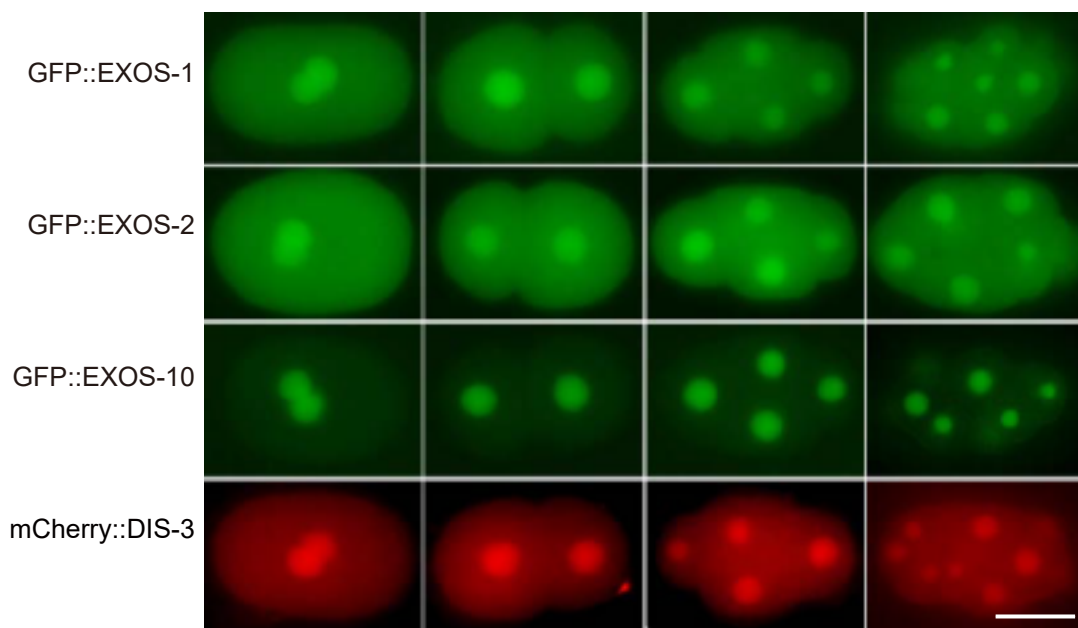

A

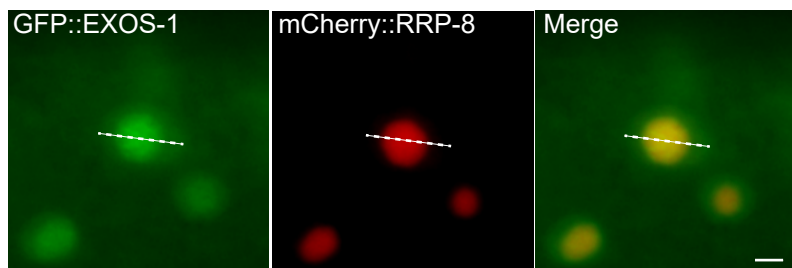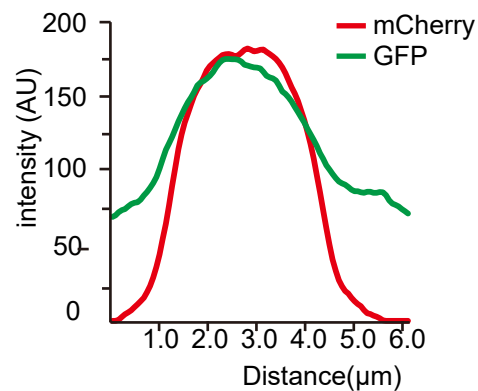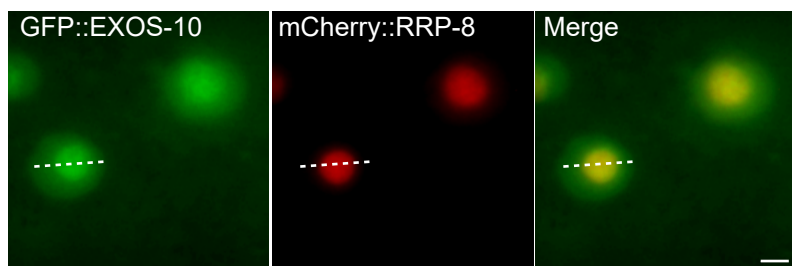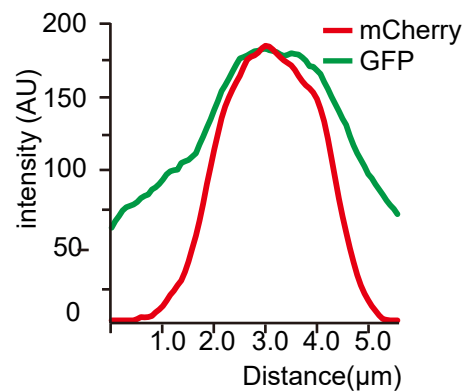

B

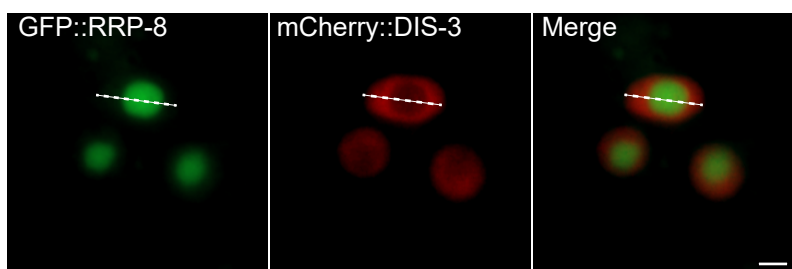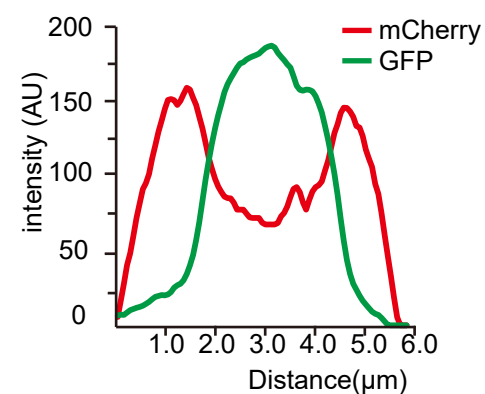

C

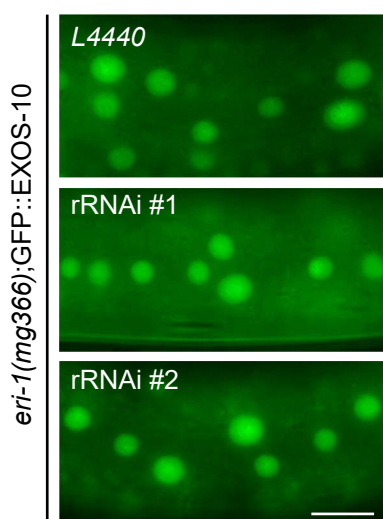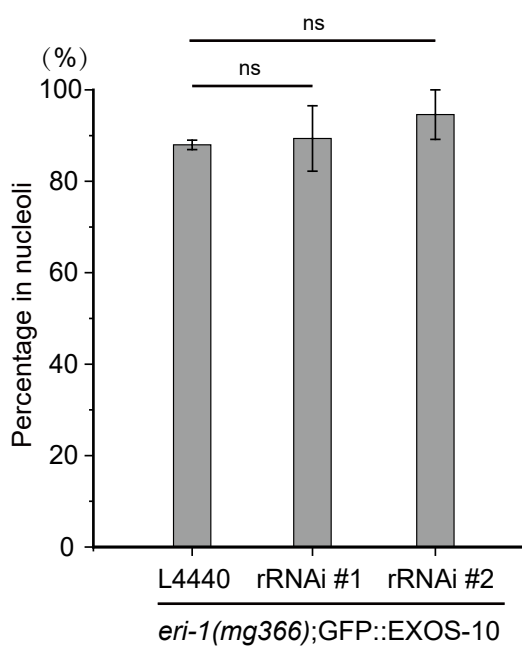

D

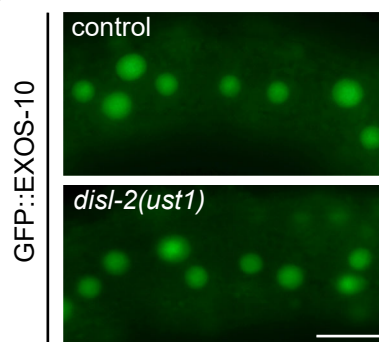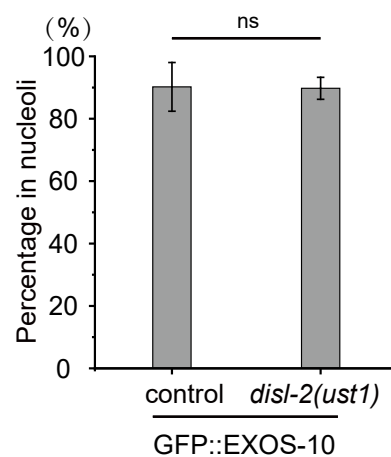

A

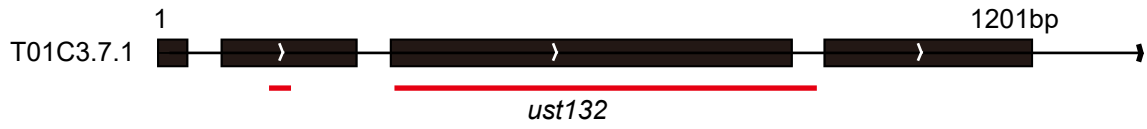

WT: CGGTGGTCGTGG (24bp) CAGTTTCG (134bp) GTGGTTTT (573bp) atatttatattacag  
*fib-1(ust132)*: CGGTGGTCGTGG-----CAGTTTCG (134bp) GTGGTTTT--TAT--atatttatattacag (-597bp, +3bp)  
 144 917

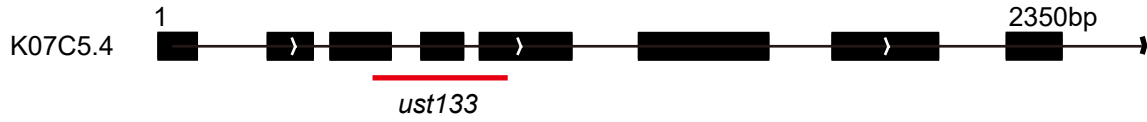

WT: TACTGAAGCGTT (339bp) GGACAAGGATATCAA  
*nol-56(ust133)*: TACTGAAGCGTT-----GGACAAGGATATCAA (-339bp)  
 553 918

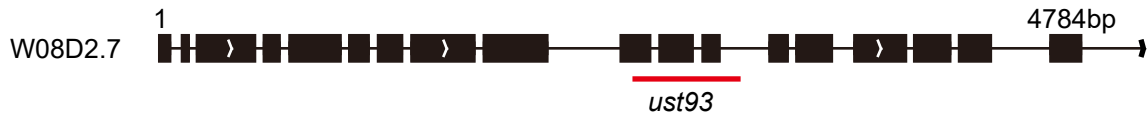

WT: AGAGTTGAAGGA (339bp) tcaaaatgtaaaca  
*mtr-4(ust93)*: AGAGTTGAAGGA-----tcaaaatgtaaaca (-534bp)  
 2460 3020

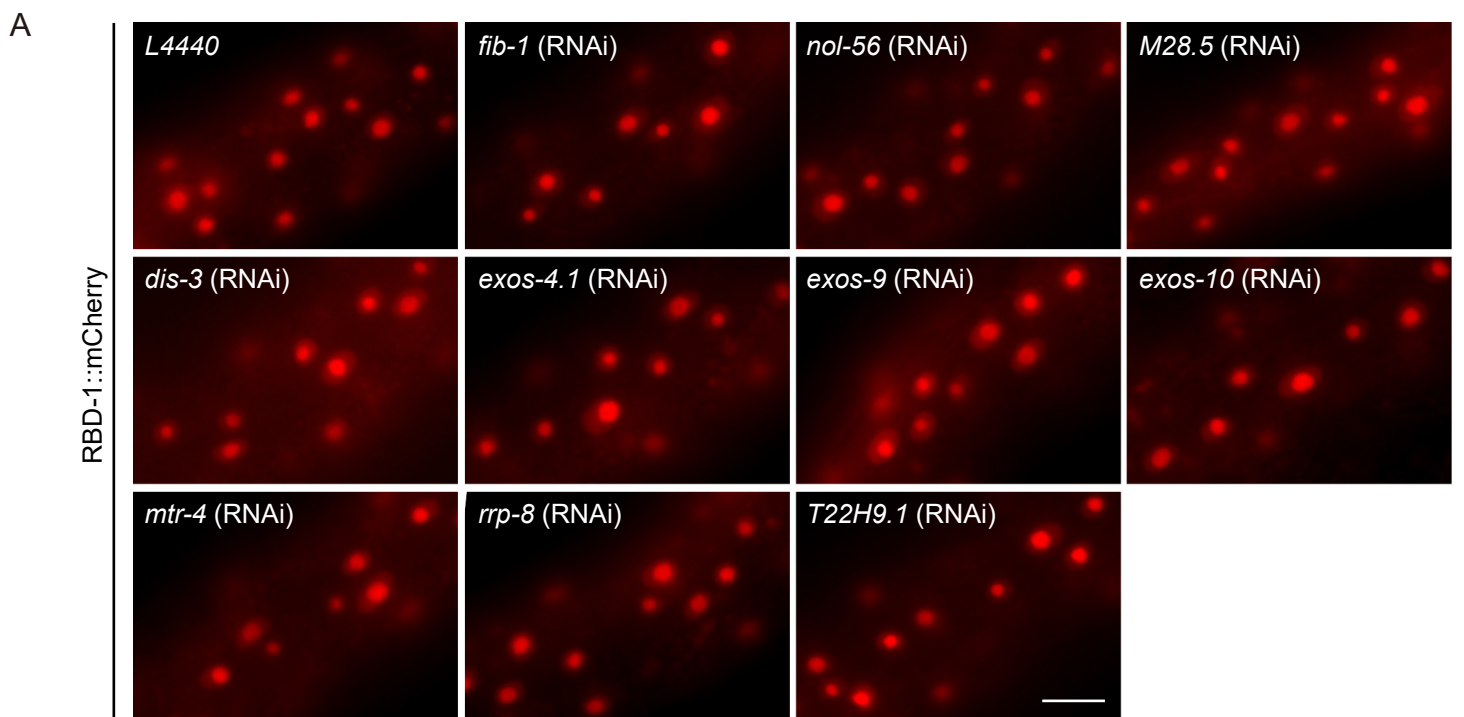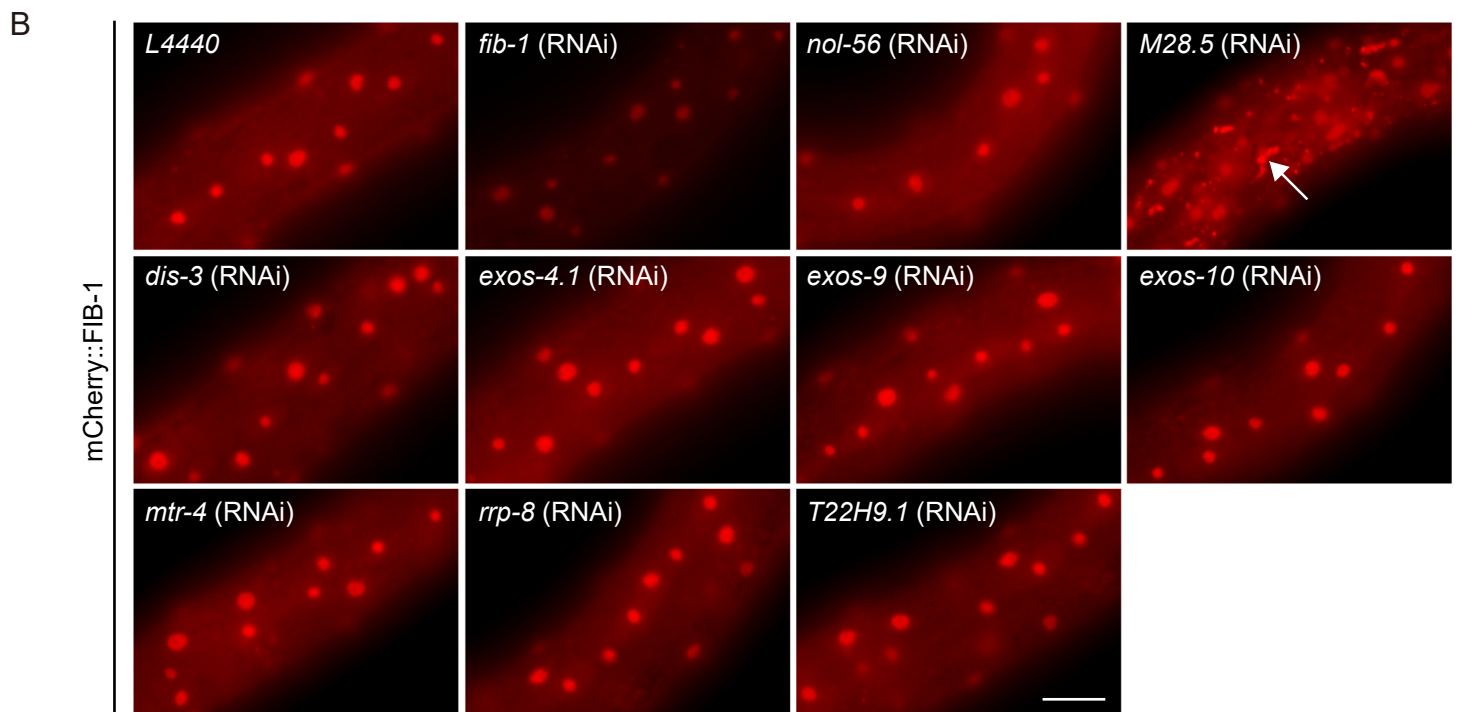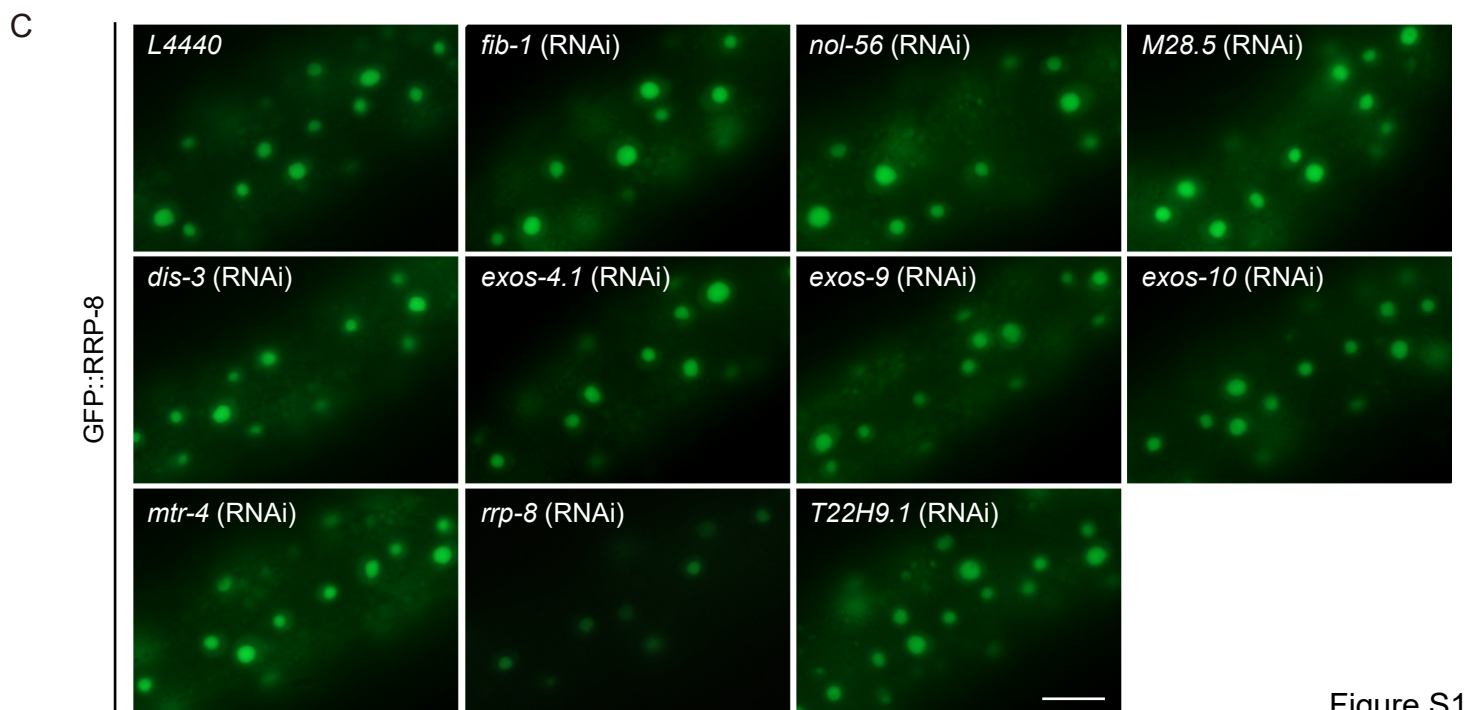

Figure S11

Table S1: Candidate-base RNAi screening for factors affecting the subcellular localization of GFP::EXOS-10.

| gene ID        | gene name     | NCL%  | yeast | human  | predicted functions                                                                              |
|----------------|---------------|-------|-------|--------|--------------------------------------------------------------------------------------------------|
| L4440(control) | /             | 95.5% |       |        |                                                                                                  |
| K07C5.4        | <i>nol-56</i> | 0%    | NOP56 | NOP56  | histone methyltransferase binding activity and snoRNA binding activity                           |
| T01C3.7        | <i>fib-1</i>  | 4.6%  | FIB1  | FBL    | have RNA binding activity and methyltransferase activity                                         |
| M28.5          | <i>phi-9</i>  | 11.9% | SNU13 | SNU13  | box C/D snoRNP complex                                                                           |
| W08D2.7        | <i>mtr-4</i>  | 22.7% | MTR4  | MTR4   | have ATP binding activity, RNA binding activity, and RNA helicase activity                       |
| F10B5.1        | <i>rpl-10</i> | 31.8% | RPL10 | RPL10  | ribosomal large subunit assembly                                                                 |
| F37C12.13      | <i>exos-9</i> | 60.0% | RRP45 | EXOSC9 | exonucleolytic trimming to generate mature 3'-end of 5.8S rRNA from tricistronic rRNA transcript |
| C04G2.6        | <i>dis-3</i>  | 68.2% | RRP44 | DIS3   | exosome endoribonuclease and 3'-5' exoribonuclease                                               |
| ZK265.6        | <i>nol-16</i> | 75.0% | NOP16 | NOP16  | ribosomal large subunit biogenesis                                                               |
| K09B11.2       | <i>nol-9</i>  | 78.8% | GRC3  | NOL9   | Polynucleotide 5'-kinase involved in rRNA processing                                             |
| F25H8.2        | /             | 85.0% | NAF1  | NAF1   | box H/ACA snoRNP assembly                                                                        |
| K01G5.5        | /             | 90.9% | CBF5  | DKC1   | box H/ACA snoRNP complex                                                                         |
| F32E10.1       | <i>nol-10</i> | 91.7% | NOL10 | NOL10  | an ortholog of human NOL10 (nucleolar protein 10); exhibits RNA binding activity                 |
| C27H6.2        | <i>ruvb-1</i> | 95.0% | RUVB1 | RUVBL1 | involved in TOR signaling, box C/D snoRNP assembly                                               |
| Y48A6B.3       | /             | 95.0% | NHP2  | NHP2   | box H/ACA snoRNP complex                                                                         |
| Y66H1A.4       | /             | 95.5% | GAR1  | GAR1   | box H/ACA snoRNP complex                                                                         |



Table S2: Strains used in the work.

---

Genotype

---

*N2*

*CB4856*

*dis-3(ust56)*

*exos-1(ust57)*

*eri-1(mg366);3XFLAG::GFP::NRDE-3(ggIS1)*

*eri-1(mg366);dis-3(ust56);3XFLAG::GFP::NRDE-3(ggIS1)*

*eri-1(mg366);dis-3(ok357);3XFLAG::GFP::NRDE-3(ggIS1)*

*eri-1(mg366);dis-3(ust56);mCherry::DIS-3(ustIS115);3XFLAG::GFP::NRDE-3(ggIS1)*

*eri-1(mg366);dis-3(ust56);rrf-1(pk1417);3XFLAG::GFP::NRDE-3(ggIS1)*

*eri-1(mg366);dis-3(ust56);rrf-2(ok210);3XFLAG::GFP::NRDE-3(ggIS1)*

*eri-1(mg366);dis-3(ust56);rrf-3(pk1426);3XFLAG::GFP::NRDE-3(ggIS1)*

*eri-1(mg366);dis-3(ust56);rrf-1(pk1417);rrf-2(ok210);3XFLAG::GFP::NRDE-3(ggIS1)*

*eri-1(mg366);exos-1(ust57);3XFLAG::GFP::NRDE-3(ggIS1)*

*eri-1(mg366);exos-2(tm6653);3XFLAG::GFP::NRDE-3(ggIS1)*

*eri-1(mg366);exos-3(tm6844);3XFLAG::GFP::NRDE-3(ggIS1)*

*eri-1(mg366);exos-4.1(tm5568);3XFLAG::GFP::NRDE-3(ggIS1)*

*eri-1(mg366);exos-5(ust61);3XFLAG::GFP::NRDE-3(ggIS1)*

*eri-1(mg366);exos-7(ust62);3XFLAG::GFP::NRDE-3(ggIS1)*

*eri-1(mg366);exos-8(ust60);3XFLAG::GFP::NRDE-3(ggIS1)*

*eri-1(mg366);exos-9(ok1635);3XFLAG::GFP::NRDE-3(ggIS1)*

*eri-1(mg366);exos-10(ok2269);3XFLAG::GFP::NRDE-3(ggIS1)*

*3XFLAG::GFP::EXOS-1(ustIS112)*

*3XFLAG::GFP::EXOS-2(ustIS113)*

*3XFLAG::GFP::EXOS-10(ustIS114)*

*mCherry::DIS-3(ustIS115)*

*mCherry::RRP-8(ustIS75)*

*GFP::RRP-8(ustIS76)*

*RBD-1::mCherry(ustIS207)*

*mCherry::FIB-1(ustIS36)*  
*mCherry::DIS-3(ustIS115);GFP::RRP-8(ustIS76)*  
*dis-3(ust56);3XFLAG::GFP::EXOS-1(ustIS112)*  
*dis-3(ust56);3XFLAG::GFP::EXOS-10(ustIS114)*  
*3XFLAG::GFP::EXOS-1(ustIS112);mCherry::RRP-8(ustIS75)*  
*3XFLAG::GFP::EXOS-10(ustIS114);mCherry::RRP-8(ustIS75)*  
*mCherry::DIS-3(ustIS115);GFP::RRP-8(ustIS76)*  
*eri-1(mg366);fib-1(ust132);3XFLAG::GFP::NRDE-3(ggIS1)*  
*eri-1(mg366);nol-56(ust133);3XFLAG::GFP::NRDE-3(ggIS1)*  
*eri-1(mg366);mtr-4(ust93);3XFLAG::GFP::NRDE-3(ggIS1)*  
*3XFLAG::GFP::RPOA-2(ustIS116)*  
*3XFLAG::GFP::RPOA-2(ustIS116);mCherry::FIB-1(ustIS36)*  
*GFP::NRDE-2(ustIS117);mCherry::RPOA-2(ustIS116)*  
*eri-1(mg366);3XFLAG::GFP::RPOA-2(ustIS116)*  
*eri-1(mg366);nrde-2(gg91);3XFLAG::GFP::RPOA-2(ustIS116)*

---

Table S3. Sequences of sgRNAs for CRISPR/Cas9-mediated gene editing.

|                 |                          |
|-----------------|--------------------------|
| rpoa-2_sg#1     | TTCAGTTCGGCCACAATTCG     |
| rpoa-2_sg#2     | ATTGTGGCCGAACACTGAACAG   |
| rpoa-2_sg#3     | GCGACAGCCACTGTTTCAGTT    |
| exos-1_sg#1     | ACAAGGTTCTCGACGCGAT      |
| exos-1_sg#2     | ATCACTTGCACCAGGTTGT      |
| exos-1_sg#3     | ATACTGATGATGTCACATT      |
| exos-1_sg#4     | CCGACAGCCATCACTTTGG      |
| exos-5_sgRNA #1 | GAGTGATGAGGCTATGACTC     |
| exos-5_sgRNA #2 | GTACATGGAATTCAGGATGA     |
| exos-5_sgRNA #3 | GCATCCAGAAGTGTGTGCGA     |
| exos-7_sgRNA #1 | GGCGAATTGACTGCTCGCGT     |
| exos-7_sgRNA #2 | GGTGACGTTGCACCAGATGA     |
| exos-7_sgRNA #3 | GTTGAGATTGTCAGCAGCAG     |
| exos-8_sg#1     | GAGTCTATCCTGACGGACG      |
| exos-8_sg#2     | GTTAGTGATGCACCCCTGG      |
| exos-8_sg#3     | TGTGGCAAACCTTTGCCTC      |
| exos-8_sg#4     | CGTCAATCGATGCATTGTT      |
| nrde-2_sgRNA#1  | GGAACAATGTTTTCGAGCGTATGG |
| nrde-2_sgRNA#2  | GAAACATTGTTTCATTAAGTTTGG |
| fib-1_sgRNA#1   | GCGGTGGTCGTGGAGGATA      |
| fib-1_sgRNA#2   | TGTCCGTCGATGACGGAGC      |
| fib-1_sgRNA#3   | CCACTTGAGCAGGTAACCC      |
| nol-56_sgRNA#1  | TCGATGCCGCTCATGCTGA      |
| nol-56_sgRNA#2  | ATCTGAAGCTTGTCTTCGG      |
| nol-56_sgRNA#3  | ATTGCCCTTCTCGATCAGT      |
| mtr-4_sgRNA#1   | TGAAGGAATGGCTGTTTCA      |
| mtr-4_sgRNA#2   | GTACAAAGTACATTGCATT      |
| mtr-4_sgRNA#3   | TCGTATATCAATGGGTAA       |
| mtr-4_sgRNA#4   | GCCAAGGCTTTAGCGAATA      |

Table S4. Sequences of quantitative real-time PCR primers for ChIP experiments.

|                        |                              |
|------------------------|------------------------------|
| <i>eft-3</i> qRT F     | CAAGGATATTCGTCGTGGATCC       |
| <i>eft-3</i> qRT R     | AATCGAGAACTGGAGTGTATCCG      |
| <i>ama-1</i> qRT F     | CGAACCTGCCGATTGATA           |
| <i>ama-1</i> qRT R     | ACCACGATTGACCAACTC           |
| <i>lin-15b</i> qRT #1F | ACCGAGACCAGCCAATGT           |
| <i>lin-15b</i> qRT #1R | TCTTCATCCAGTGGTTCATCCT       |
| <i>lin-15b</i> qRT #2F | CACTGAACTCACAAGACCACAC       |
| <i>lin-15b</i> qRT #2R | TCCAATTTGAAGTCATCCCTCTG      |
| 5ETS-1F                | CCTACACTCATGTCTTTGCAGA       |
| 5ETS-1R                | GCCGTACTIONATGCAGCAAGG       |
| 5ETS-2F                | CCACATTCAGAGGCTGGTGA         |
| 5ETS-2R                | CCTCTCACCAGCCTATCATTCG       |
| 5ETS-3F                | CGTCTCTCAAATTGCACACTGC       |
| 5ETS-3R                | CCTGAGACATCACGTCTCAGAC       |
| rDNA#1 F               | CAAGACCAATACCGCAACATCA       |
| rDNA#1 R               | TCATTGCGCCGATCCATAGAT        |
| rDNA#2 F               | GGAGCTAATACATGCAACTATACCC    |
| rDNA#2 R               | CAGTCGAAACTGACAGTAAACTGC     |
| rDNA#3 F               | GGATGAGTTATTTCAATGAGTTGAATAC |
| rDNA#3 R               | CGCAGCAATAACGAGATACTAG       |
| rDNA#4 F               | CTTCGAGTAGCAAGGAGAGG         |
| rDNA#4 R               | GCACGTAACCTAGATCCAACACTAC    |
| rDNA#5 F               | GGACTGTCGCTTCGAGGTTTAA       |
| rDNA#5 R               | GCGATGATCCAGCTGCAG           |
| rDNA#6 F               | GAATCAGTACACTGATTGCCAAAAG    |
| rDNA#6 R               | GTTCTTCATCGATACTCGATGC       |
| rDNA#7 F               | CGATAGCGAACAAGTACC           |
| rDNA#7 R               | TCTCCAAGCAACATCAAC           |
| rDNA#8 F               | TAATGTCTCAACCTATTCTCAA       |
| rDNA#8 R               | GCCAGTTCTGCTTACCAA           |
| rDNA#9 F               | GGAATCCGACTGTCTAAT           |
| rDNA#9 R               | CGCTTACTCGAATTACTAC          |
| rDNA#10 F              | CATACGACTTGGTCTCTTGG         |
| rDNA#10 R              | CTGCAAAGACATGAGTGTAGG        |
| rDNA#11 F              | GTCTGGTTTATTCGATAACGAG       |
| rDNA#11 R              | GACCTGTTATCGCTCAATCTC        |
| rDNA#12 F              | CTCGGCTGATCATCAAGACG         |
| rDNA#12R               | CGATATCAACACACACACGAGAC      |
| rDNA#13F               | GTGAACTGTCAACGTGAATGC        |
| rDNA#13R               | GGTCTCATGAGCGAGAAGTTAG       |

Table S5. Sequences of quantitative real-time PCR primers for detecting the pre-rRNA and rRNA levels.

|                        |                              |
|------------------------|------------------------------|
| <i>eft-3</i> E2L F     | GTAAGGGATCTTTCAAGTACGC       |
| <i>eft-3</i> E2L R     | CATCGATGATGGTGATGTAGTAC      |
| 5S 1F                  | CTCTCCACACAACACACAGC         |
| 5S 1R                  | ATATGGTCGTAAGCGTCTATGG       |
| <i>lin-15b</i> pre#1 F | CAATTCCTAACAATCATAAACTCTCAA  |
| <i>lin-15b</i> pre#1 R | GGAGGTATATAAGGTGGTTGAATGTTTC |
| <i>lin-15b</i> pre#2 F | CAATTCCTAACAATCATAAACTCTCAA  |
| <i>lin-15b</i> pre#2 R | CATTGTCAATGTAGTGGAGGATG      |
| pre#1 F                | TCATTGCGCCGATCCATAGAT        |
| pre#1 R                | CAAGACCAATACCGCAACATCA       |
| pre#2 F                | CAAGACCAATACCGCAACATCA       |
| pre#2 R                | CGCAGACATATAGTCTAGCGAG       |
| pre#3 F                | CCCTTGCTGCATAGTACGGC         |
| pre#3 R                | TCAGCAGCATGTCAATGTGGT        |
| pre#4 F                | GGACACACCACCAAAGTCTCAA       |
| pre#4 R                | TTGAGAGACGGCAGACAACG         |
| pre#5 F                | CTGTATGAGTGTCCCATCTCACG      |
| pre#5 R                | GCATGGCTTAATCTTTTACTTGAGC    |
| pre#6 F                | CGCATTGGTTTGAACCGG           |
| pre#6 R                | CAACTGACCGTGAAGCCAG          |
| pre#7 F                | CGTAACAAGGTAGCTGTAGGTG       |
| pre#7 R                | CTGGAACGTTGACATTTTCGAC       |
| pre#8 F                | CATACGACTTGGTCTCTTGG         |
| pre#8 R                | CTGCAAAGACATGAGTGTAGG        |
| 18S#1 F                | CGATAACAGGTCTGTGATGCCC       |
| 18S#1 R                | TACCCTATCCCGGACATGGAAG       |
| 26S#1 F                | TAATGTCCTCAACCTATTCTCAA      |
| 26S#1 R                | GCCAGTTCTGCTTACCAA           |
| 26S#2 F                | GGAATCCGACTGTCTAAT           |
| 26S#2 R                | CGCTTACTCGAATTACTAC          |
